# Supplementary material
Source: PubMed Central journal article supplement (PMC7331063)
Supplement: ao0c01337_si_001.pdf [file ao0c01337_si_001.pdf]

**Supporting Information for**  
**“Upgraded AMBER Force Field for Zinc-binding**  
**Residues and Ligands for Predicting Structural**  
**Properties and Binding Affinities in Zinc**  
**Proteins”**

Marina Macchiagodena,<sup>†</sup> Marco Pagliai,<sup>\*,†</sup> Claudia Andreini,<sup>†,‡</sup> Antonio  
Rosato,<sup>†,‡</sup> and Piero Procacci<sup>\*,†</sup>

*<sup>†</sup>Dipartimento di Chimica “Ugo Schiff”, Università degli Studi di Firenze, Via della  
Lastruccia 3, 50019 Sesto Fiorentino, Italy*

*<sup>‡</sup>Magnetic Resonance Center (CERM)-Università degli Studi di Firenze, Via L. Sacconi 6,  
50019 Sesto Fiorentino, Italy*

E-mail: marco.pagliai@unifi.it; piero.procacci@unifi.it

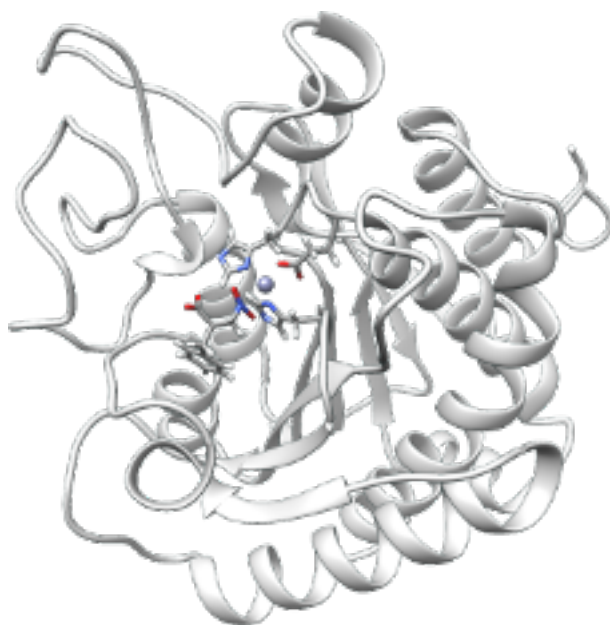

Figure S1: Structure of 2RFH.

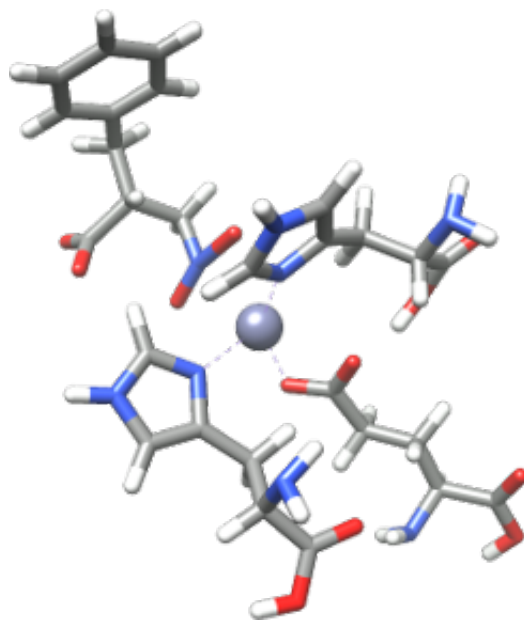

Figure S2: Complex used to reparametrize the inhibitor atomic charges.

Table S1: Reparameterized atomic charges for inhibitor (R)-2-benzyl-3-nitropropanoic acid. The atom name are taken from pdb file.

| Atoms | Atomic Charges (e) |
|-------|--------------------|
| c01   | -0.139928          |
| h01   | 0.123791           |
| c02   | -0.148442          |
| h02   | 0.110557           |
| c03   | -0.153123          |
| h03   | 0.109600           |
| c04   | -0.139475          |
| h04   | 0.120572           |
| c05   | -0.120288          |
| h05   | 0.200177           |
| c06   | -0.122948          |
| h06   | 0.020808           |
| h07   | 0.017059           |
| c07   | 0.043506           |
| h08   | 0.159763           |
| c08   | 1.099336           |
| h09   | -0.197668          |
| h10   | -0.287478          |
| c09   | -0.060979          |
| c10   | 0.669963           |
| o11   | -0.669678          |
| o12   | -0.659541          |
| n13   | -0.369745          |
| o14   | -0.044830          |
| o15   | -0.561009          |

Table S2: X-Zn-Y angle mean value and standard deviation calculated for 4YBG, 2CDB, 1V4Y, 1KOL and 4Z1D proteins; with X and Y are indicated the interacting atoms.

| Angle                | Mean (°) | Standard deviation (°) |
|----------------------|----------|------------------------|
| <b>4YBG</b>          |          |                        |
| N(H291)-Zn-S(C288)   | 103.41   | 4.37                   |
| S(C288)-Zn-S(C300)   | 105.76   | 4.50                   |
| S(C300)-Zn-O2(E131)  | 88.11    | 5.11                   |
| O2(E131)-Zn-N(H291)  | 91.96    | 4.58                   |
| <b>2CDB</b>          |          |                        |
| N(H66)-Zn-S(C39)     | 117.67   | 7.43                   |
| S(C39)-Zn-O2(E67)    | 112.88   | 8.82                   |
| <b>1V4Y</b>          |          |                        |
| S(C96)-Zn-N(H67)     | 91.77    | 3.16                   |
| N(H67)-Zn-N(H69)     | 112.33   | 6.03                   |
| N(H69)-Zn-O1(A366)   | 99.05    | 5.04                   |
| O1(A366)-Zn-S(C96)   | 157.35   | 6.71                   |
| <b>1KOL</b>          |          |                        |
| N(H67)-Zn-O1(D169)   | 97.03    | 5.46                   |
| S(C97)-Zn-O1(D169)   | 163.02   | 8.83                   |
| N(H67)-Zn-S(C97)     | 98.67    | 5.66                   |
| <b>4Z1D</b>          |          |                        |
| S(C18)-Zn-N(H204)    | 164.57   | 6.58                   |
| N(H204)-Zn-O2(D252)  | 98.15    | 4.70                   |
| O2(D252)-Zn-O1(E241) | 100.18   | 5.43                   |
| O1(E241)-Zn-S(C18)   | 96.83    | 4.64                   |

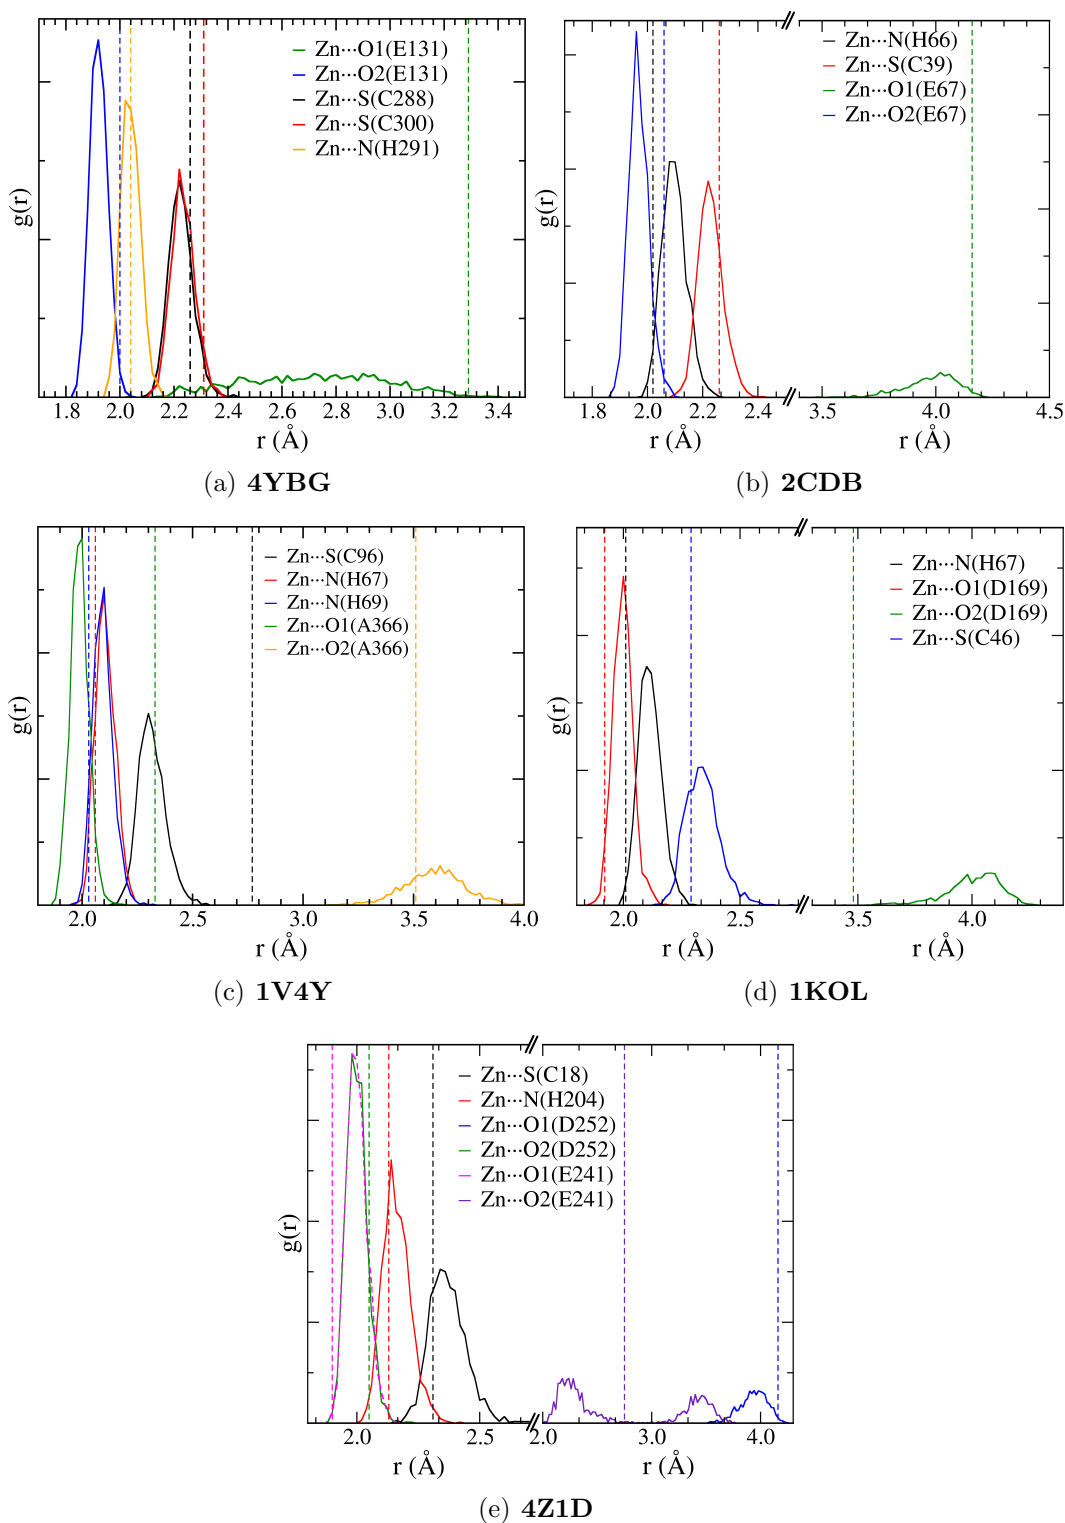

Figure S3: Radial distribution function (full line) between Zn(II) and interacting oxygen or nitrogen or sulfur atom of glutamate, aspartate, histidine or cysteinate, respectively. The corresponding reference values extracted from X-ray structures are depicted with dashed line. The comparison was performed for 4YBG (a), 2CDB (b), 1V4Y (c), 1KOL (d) and 4Z1D (e).

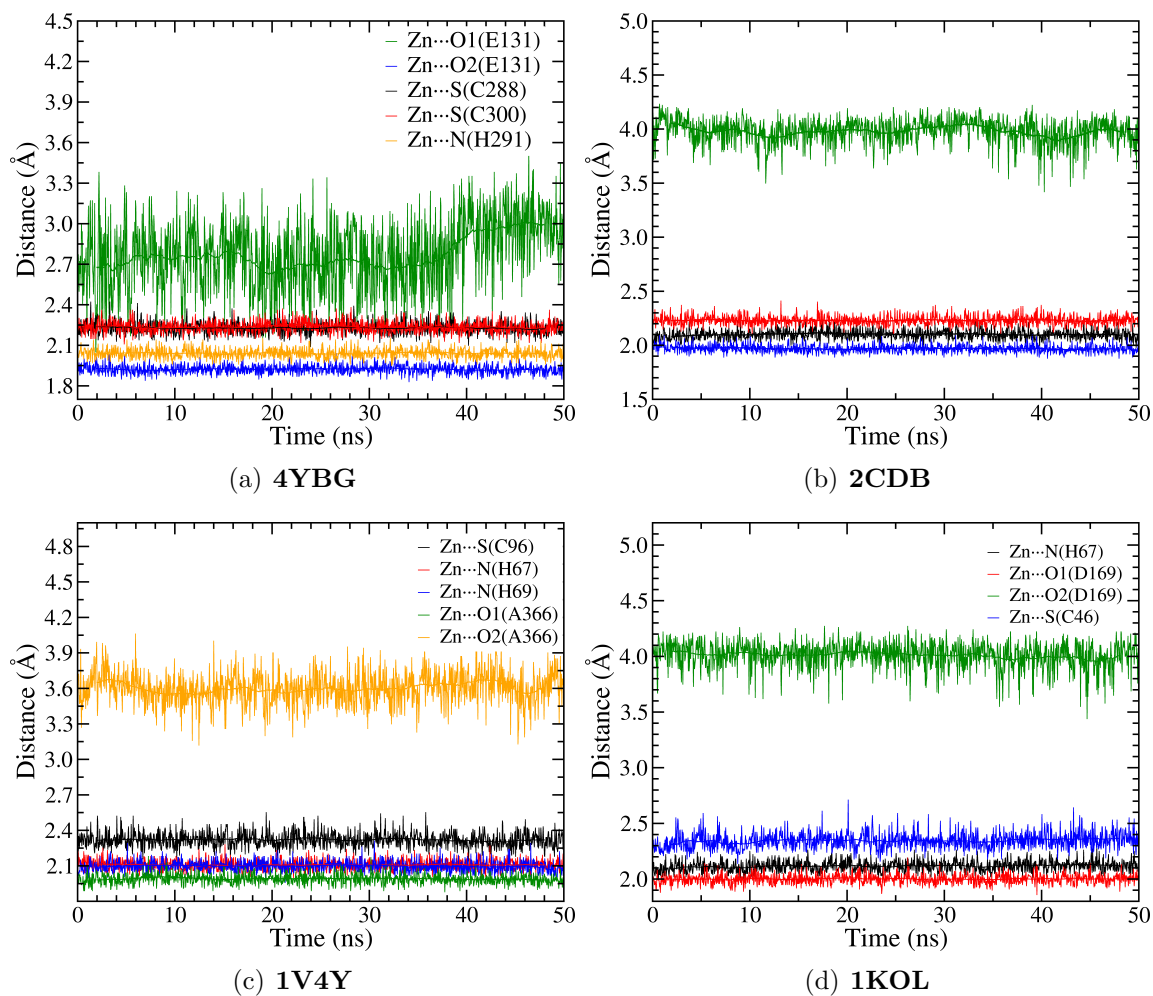

Figure S4: Pair distribution function between Zn(II) and interacting oxygen, nitrogen or sulfur atom of glutamate, aspartate, histidine or cysteine, respectively. The comparison was performed for 4YBG (a), 2CDB (b), 1V4Y (c) and 1KOL (d).

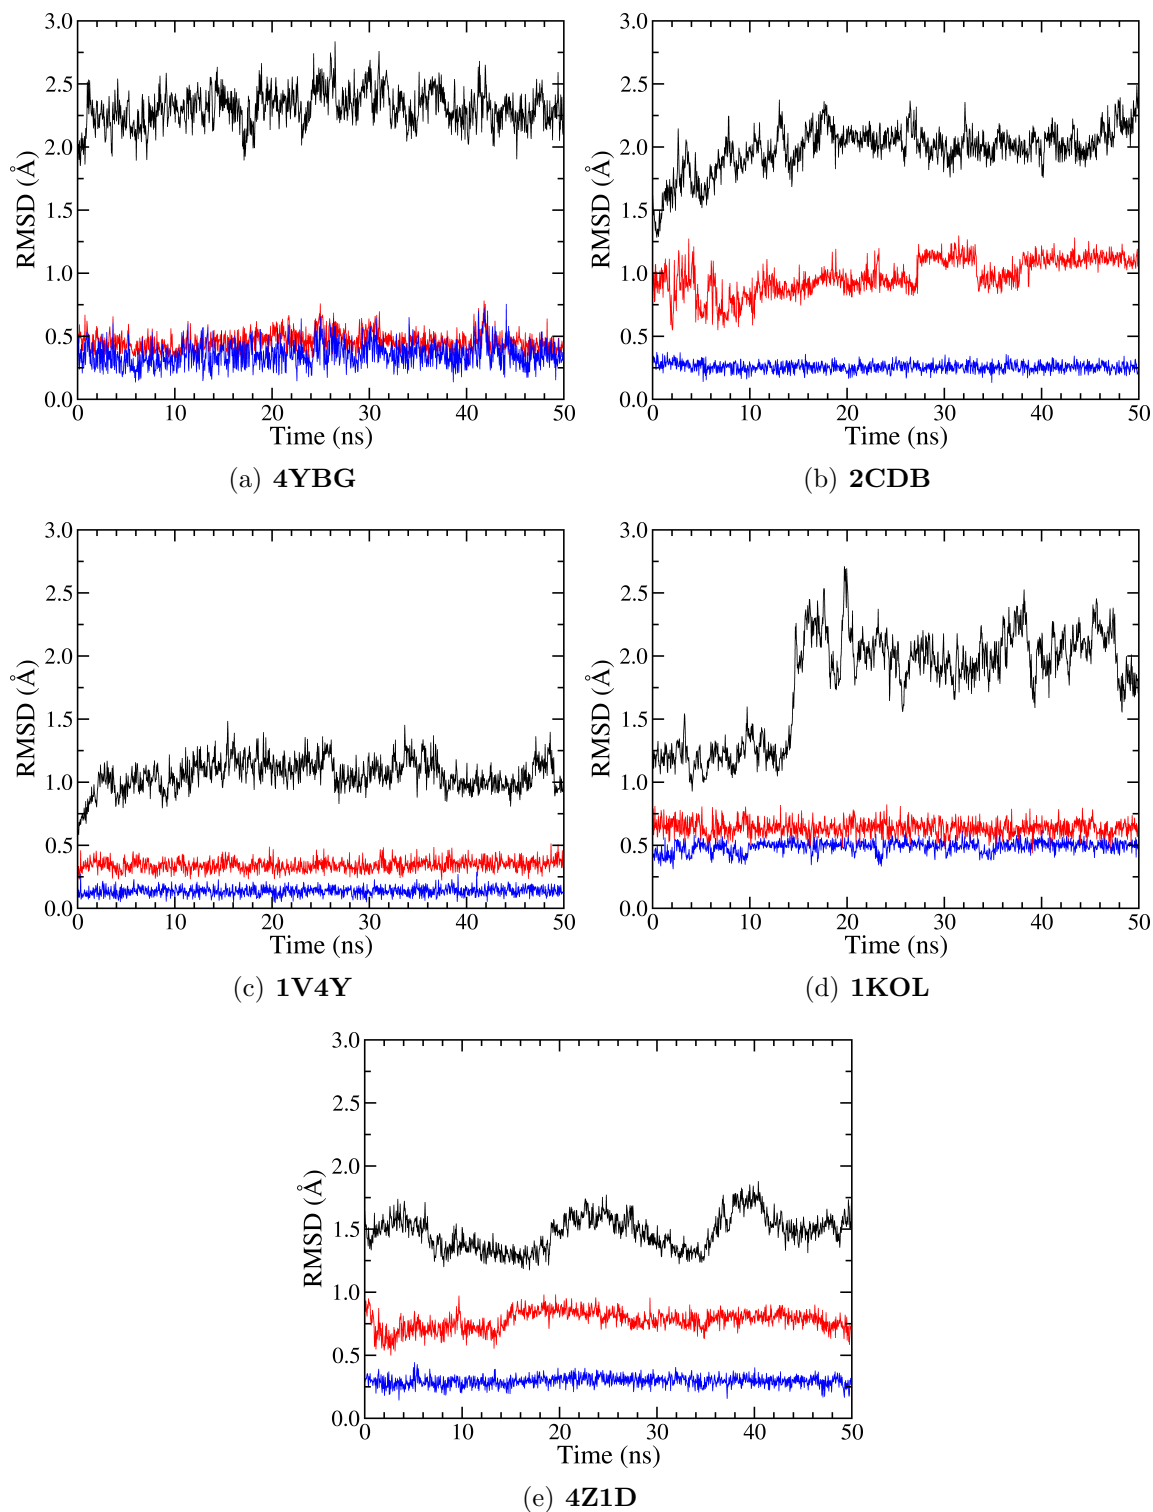

Figure S5: RMSD values of the protein backbone, metal binding site, and binding atoms monitored along the 50 ns MD trajectories. In the plots, the black, red, and blue curves represent backbone, metal binding site, and binding atoms, respectively. The comparison was performed for 4YBG (a), 2CDB (b), 1V4Y (c), 1KOL (d) and 4Z1D (e).
